# Supplementary material
Source: Royal Society of Chemistry journal article supplement (doi:10.1039/d6ew00165c)
Supplement: d6ew00165c1.pdf [file d6ew00165c1.pdf]

## Supplementary Information

### **Superoxide-Mediated Photocatalytic Degradation of Azithromycin by Cellulose Nanocrystal–TiO<sub>2</sub> Nanocomposites: From Synthetic Solutions to Hospital Wastewater**

Abhijit Saha and Swambabu Varanasi\*

Department of Chemical Engineering, Indian Institute of Technology

Kharagpur, Kharagpur, West Bengal, India – 721302

Corresponding author – [swambabu@che.iitkgp.ac.in](mailto:swambabu@che.iitkgp.ac.in)

## S1. Set Up of photocatalytic reactor.

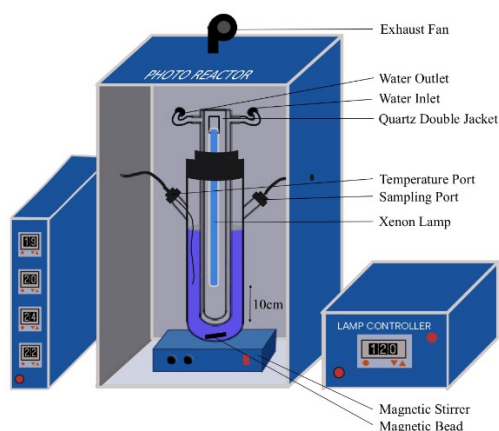

Figure S1: Schematic diagram of photocatalytic reactor.

## S2. In-vitro approach for the toxicity assessment

To evaluate the toxicity of aqueous AZM before and after photocatalytic process using CNC–TiO<sub>2</sub>, a standard plate count test was performed based on colony-forming unit (CFU) analysis. LB agar was used as the growth medium, prepared by suspending 25 grams in 1000 mL of deionized water, followed by heating to boil until the medium completely dissolved. The medium was sterilized by autoclaving at 15 lbs pressure and 121 °C for 15 minutes. Three samples were tested: AZM solution after photocatalytic treatment, untreated AZM solution, and a control containing only LB broth. Each plate was inoculated with 0.1 mL of a lab strain bacterial culture using the spread plate method under sterile conditions. The plates were incubated at 35 °C for 24–48 hours, and the number of colonies formed was counted. This method enabled the comparison of microbial viability in the presence of treated versus untreated AZM, demonstrating that CNC–TiO<sub>2</sub> photocatalysis effectively reduces the antibiotic's toxicity by converting it into non-toxic by-products.

### S3. Point of Zero charge of CNC-TiO<sub>2</sub> nanocomposites

The point of zero charge ( $\text{pH}_{\text{zc}}$ ) of the CNC-TiO<sub>2</sub> nanocomposite was determined using the pH drift method over the pH range 3–10 and was approximately 8. Briefly, 20 mL of 0.1 M NaCl solution was placed in separate conical flasks, and the initial pH was adjusted to 3–11 using 0.1 M HCl and 0.1 M NaOH. After equilibration, CNC-TiO<sub>2</sub> nanocomposites were added at a concentration of 500 mg/L, and the suspensions were stirred for 24 hours at 400 rpm. The final pH of each solution was then measured using a calibrated pH meter. The  $\text{pH}_{\text{zc}}$  was determined from a plot of initial pH versus the change in pH ( $\Delta\text{pH} = \text{pH}_{\text{final}} - \text{pH}_{\text{initial}}$ ), where the point at which  $\Delta\text{pH}$  equals zero was taken as the  $\text{pH}_{\text{zc}}$ . The corresponding  $\text{pH}_{\text{zc}}$  profile of the CNC-TiO<sub>2</sub> nanocomposite is shown in the figure below.

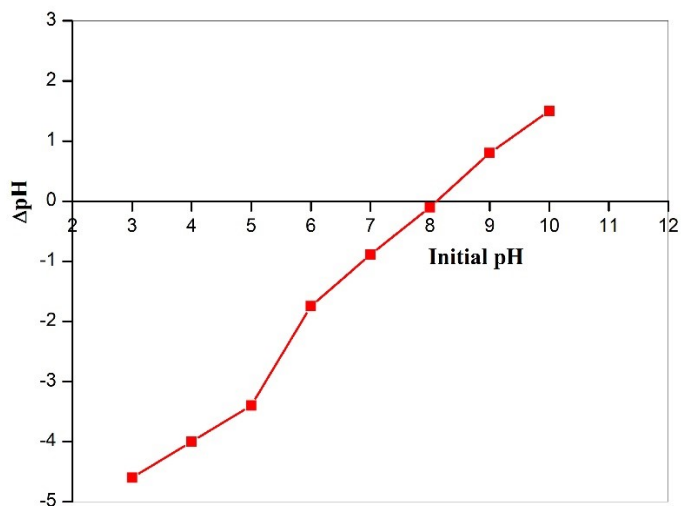

Figure S2: Point of zero charge of CNC-TiO<sub>2</sub> nanocomposites.

### S4. Zeta Potential of AZM solution

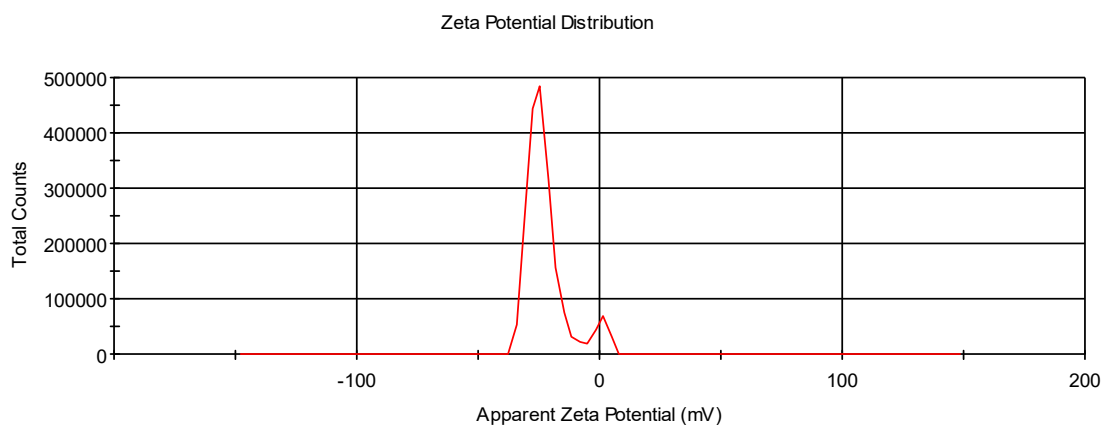

Figure S3: Zeta Potential of AZM solution.

## Results and discussion

### Characterization of CNC-TiO<sub>2</sub> nanocomposites

#### S5. Determination of Crystal size

The crystalline size of the CNC-TiO<sub>2</sub> nanocomposites was determined using Scherrer Equation (S1)

$$D = \frac{k \lambda}{\beta \cos \theta} \quad (S1)$$

where, D is the crystalline size in nm,

k is the Scherrer constant. Here k = 0.89

$\lambda = 0.154$  nm

$\beta$  is the broadening at FWHM

$\theta$  is the Bragg's angle in degree.

### Degradation pathway and possible intermediates

## S6. Sample Labels used in this study

| Sl.No | Sample | Name      |
|-------|--------|-----------|
| 1     | S1     | 30 min    |
| 2     | S2     | 60 min    |
| 3     | S3     | 120 min   |
| 4     | S4     | 180 min   |
| 5     | S5     | untreated |

Table S1: Sample labels at different time interval

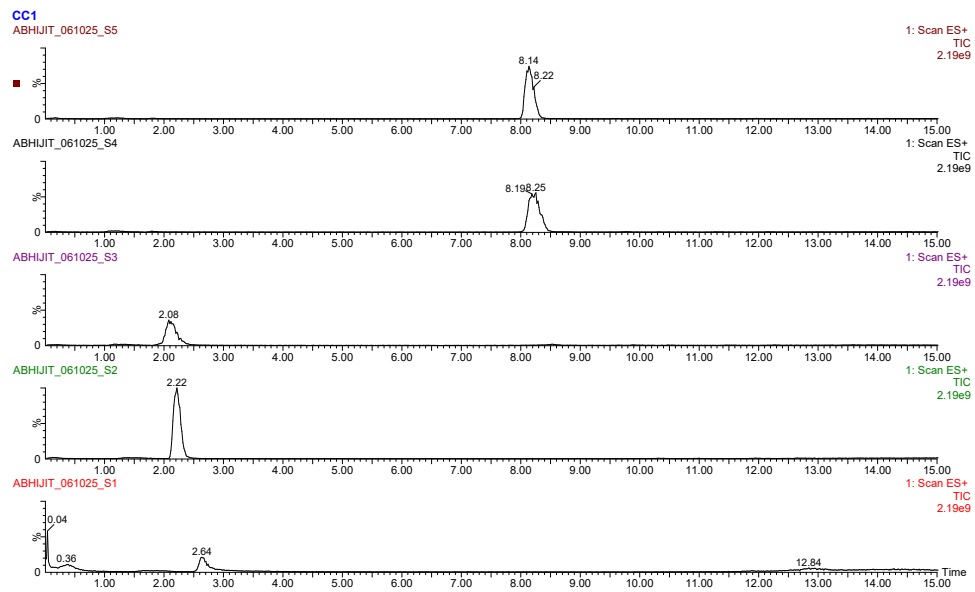

Figure S4: EIS-TIC spectrum of treated and untreated AZM samples with time



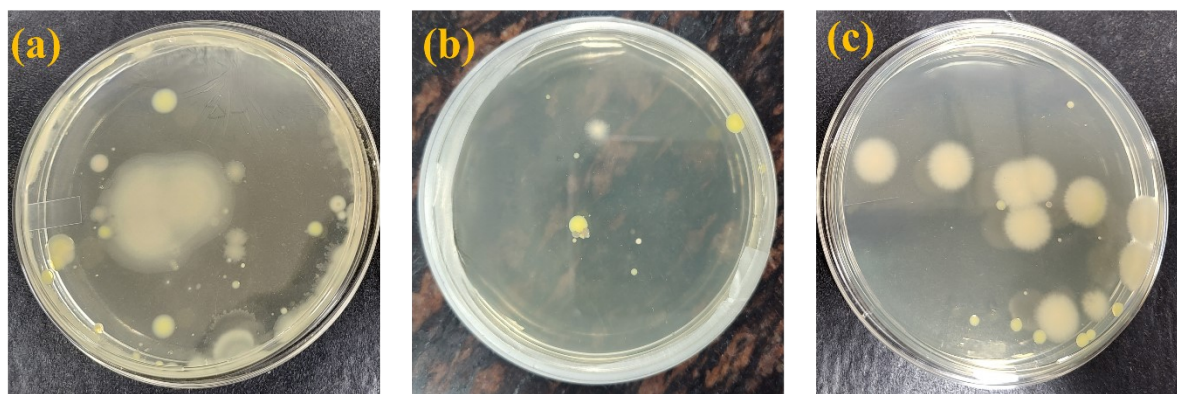

Figure S6: Colony count test with LB plate (a) Control (LB broth), (b) Untreated AZM, and (c) treated AZM solution through photocatalysis.

### S8. Leaching study

| Sl.No | Metal | Concentration (ppb) |
|-------|-------|---------------------|
| 1     | Ti    | -1.039              |
| 2     | Li    | -3.324              |
| 3     | Na    | -2.593              |
| 4     | Mg    | -0.716              |
| 5     | Al    | -0.885              |
| 6     | K     | -17.445             |
| 7     | Ca    | -5.176              |
| 8     | Cr    | -1.643              |
| 9     | Fe    | -0.255              |
| 10    | Co    | -0.003              |
| 11    | Ni    | -0.001              |
| 12    | Cu    | -0.139              |
| 13    | Zn    | -0.027              |

Table S2: Trace metal leaching study

### S9. FESEM image of reused catalyst

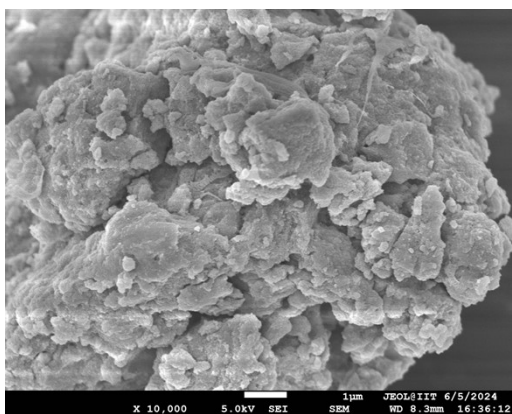

Figure S7: FESEM image of the CNC-TiO<sub>2</sub> nanocomposites after tenth cycles

### S10. Ease of recovery of catalyst

**Figure S8** shows the sedimentation behaviour (10 min settling test), illustrating the ease of catalyst recovery. The comparison between TiO<sub>2</sub> and CNC-TiO<sub>2</sub> after 10 minutes of standing clearly demonstrates the enhanced setting of the nanocomposites upon addition of CNC.

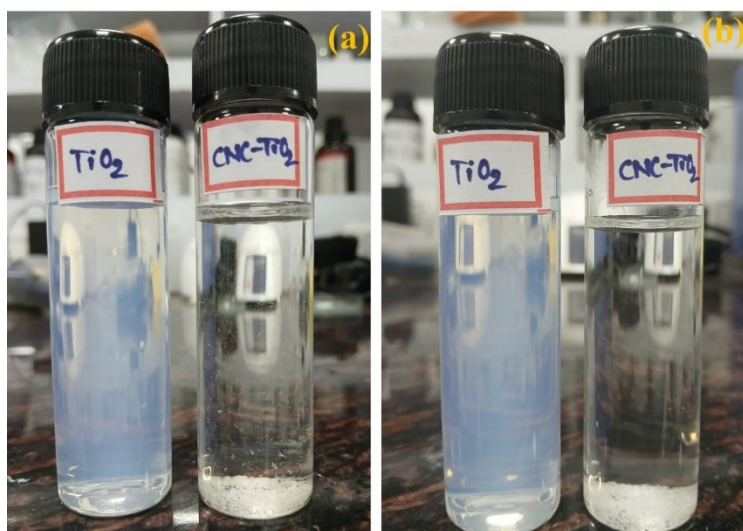

Figure S8: Settlement of TiO<sub>2</sub> and CNC-TiO<sub>2</sub> (a) before and (b) after 10 minutes of standing
